# Supplementary material for: Genetic Underpinnings of the Transition From Alcohol Consumption to Alcohol Use Disorder: Shared and Unique Genetic Architectures in a Cross-Ancestry Sample
Source: Atypon-hosted journal article supplement (doi:10.1176/appi.ajp.21090892), 2023-06-07

Figure S1: Analytic methods

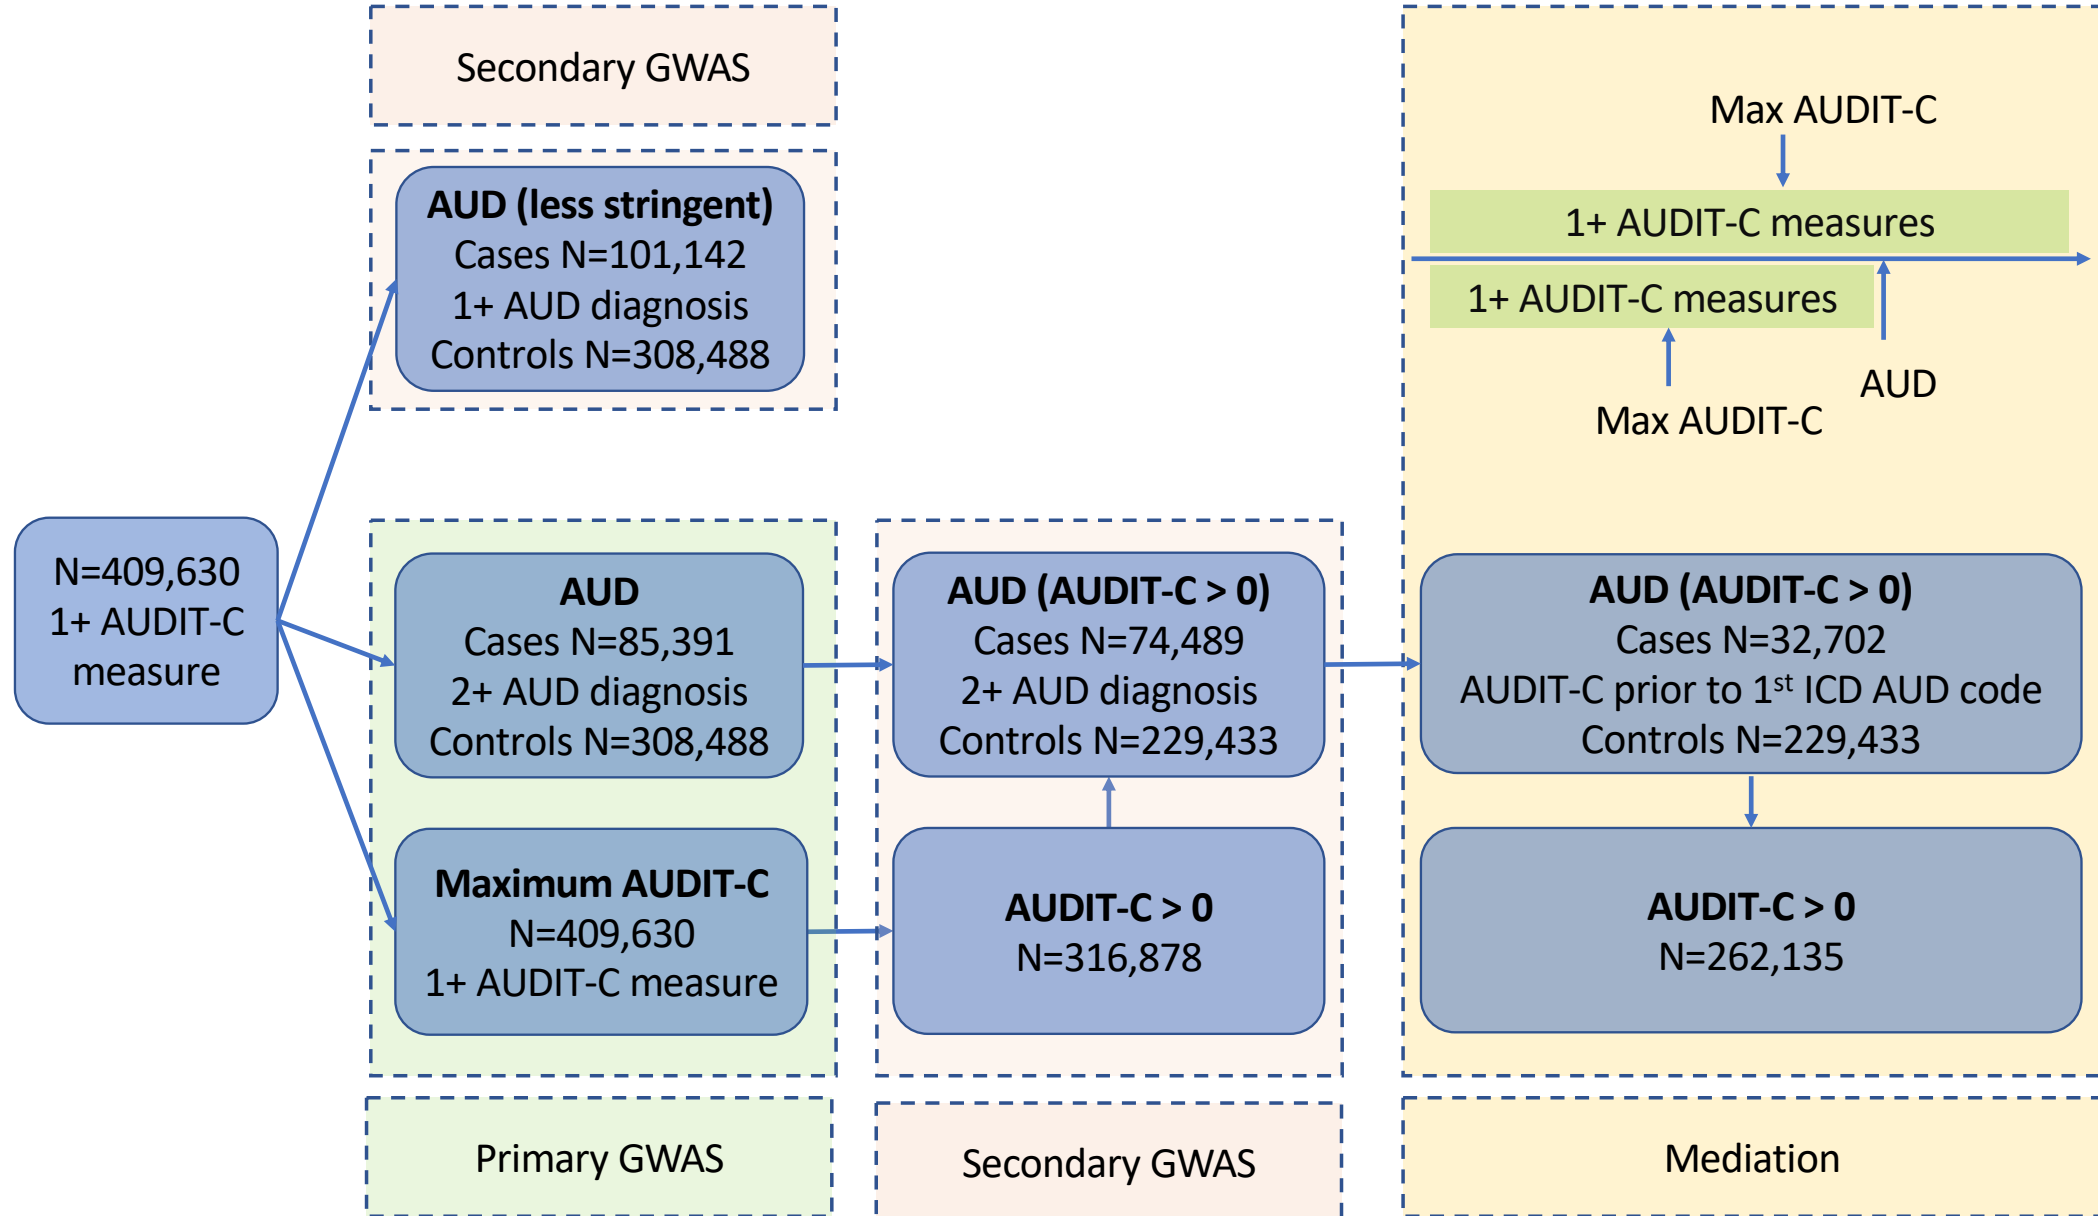

Figure S2: AUDIT-C scores

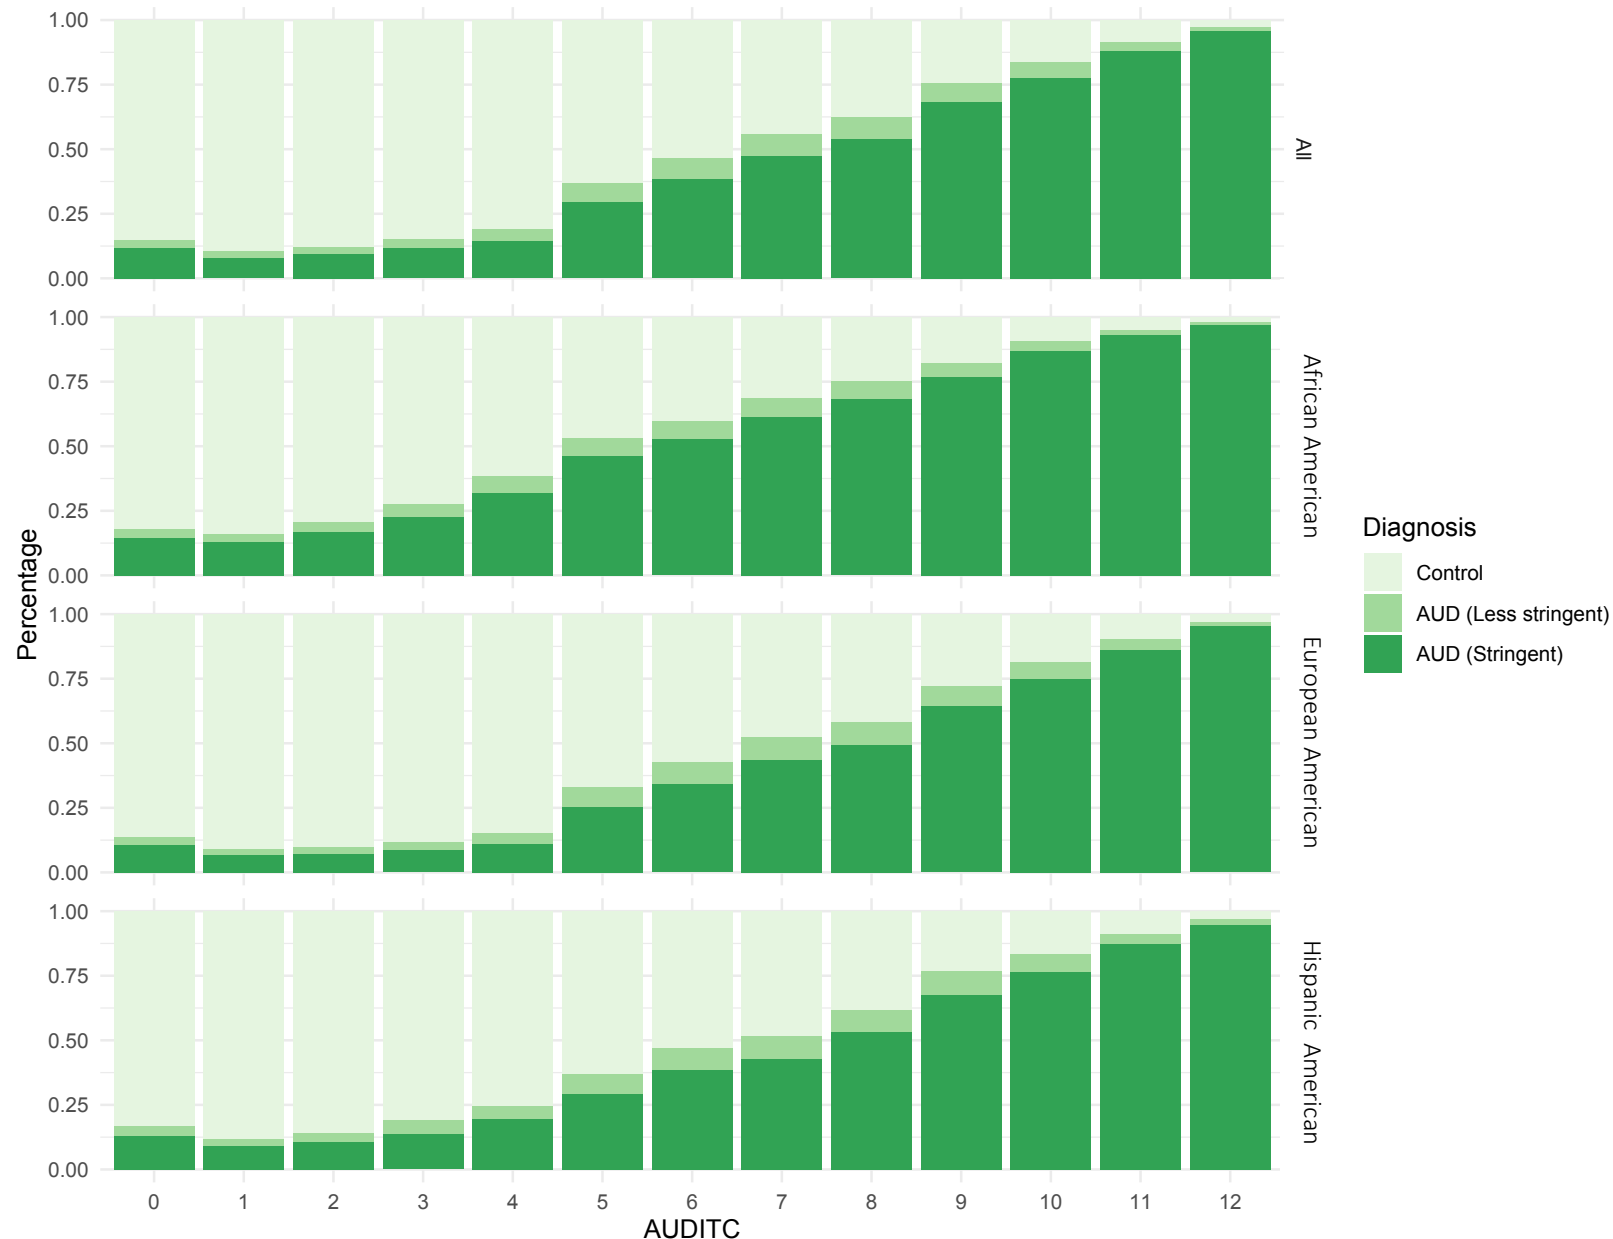

# Figure S3: Summary of GWAS results

Numbers in circles at top represent number of GWS loci overlapping between GWAS

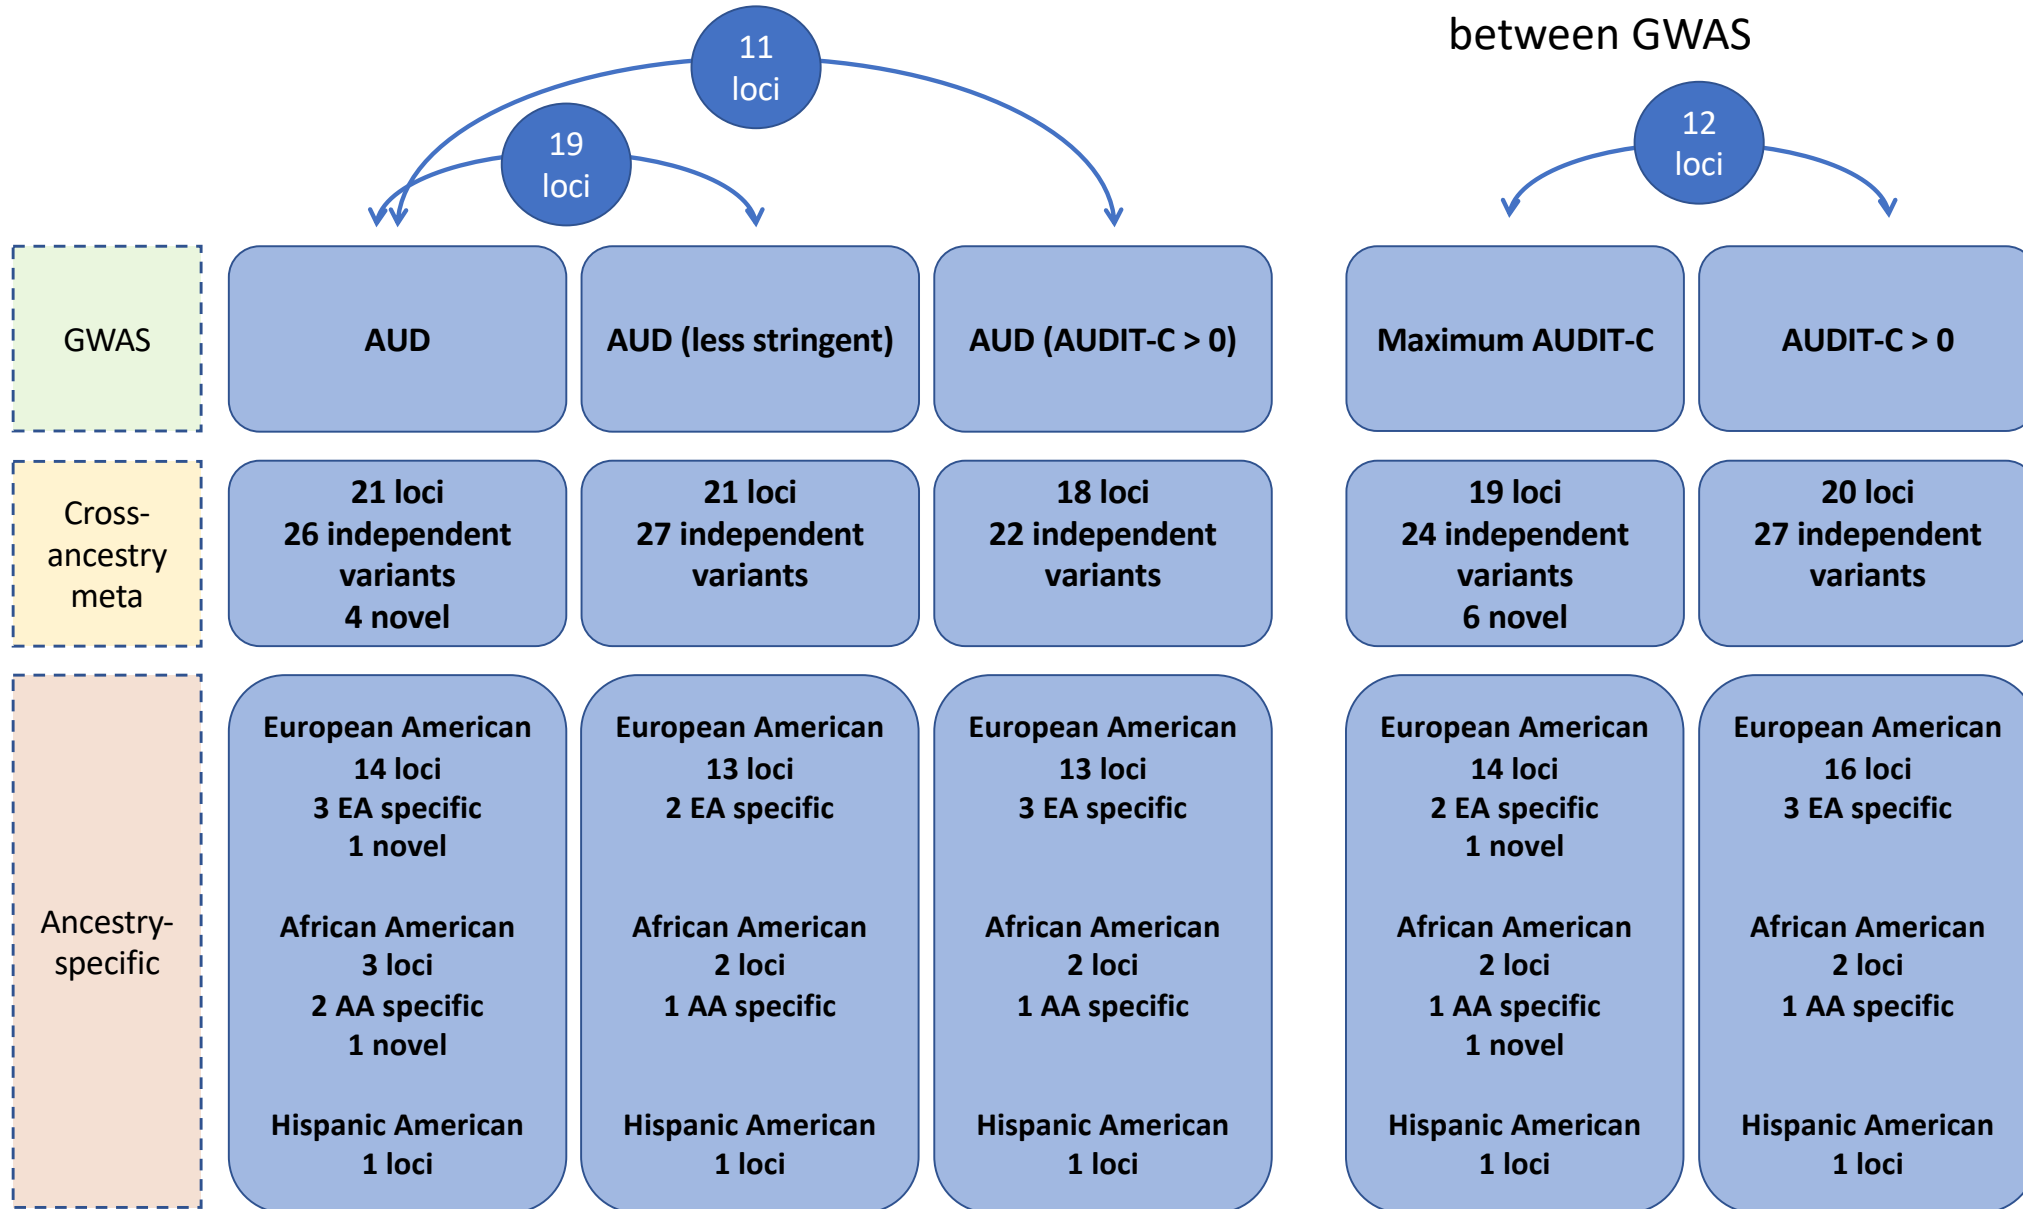

Figure S4: Manhattan plots for AUD by ancestry

European American

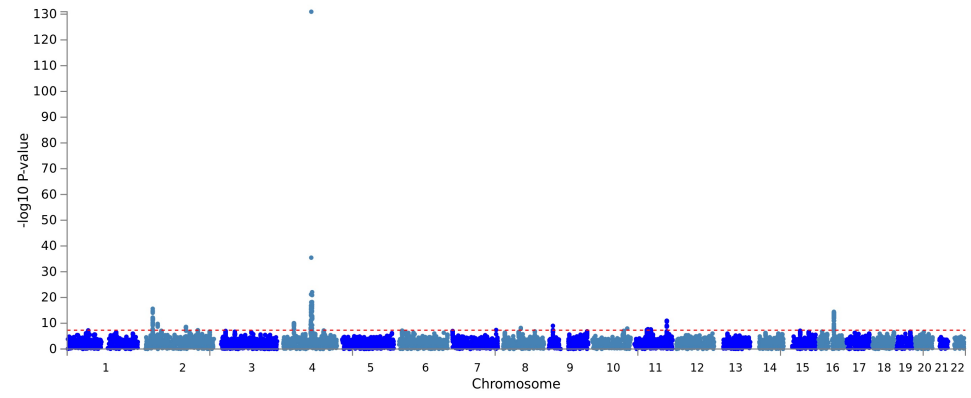

African American

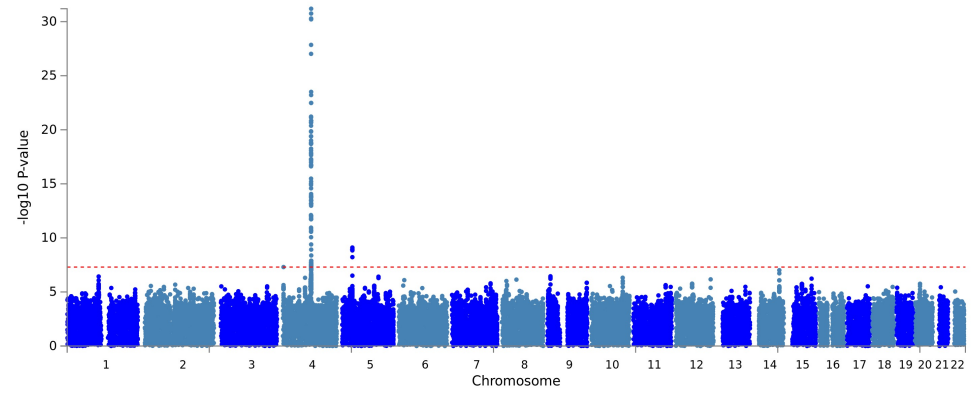

Hispanic American

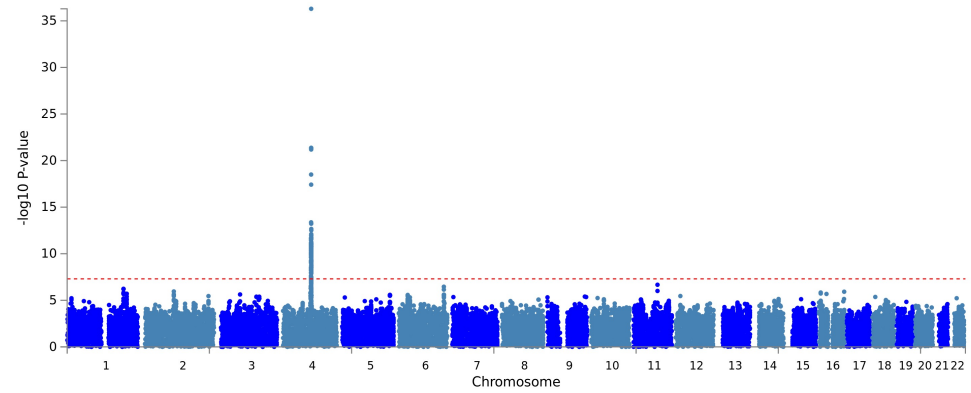

Figure S5: Locus zoom plots for ancestry-specific variants associated with AUD in European Americans

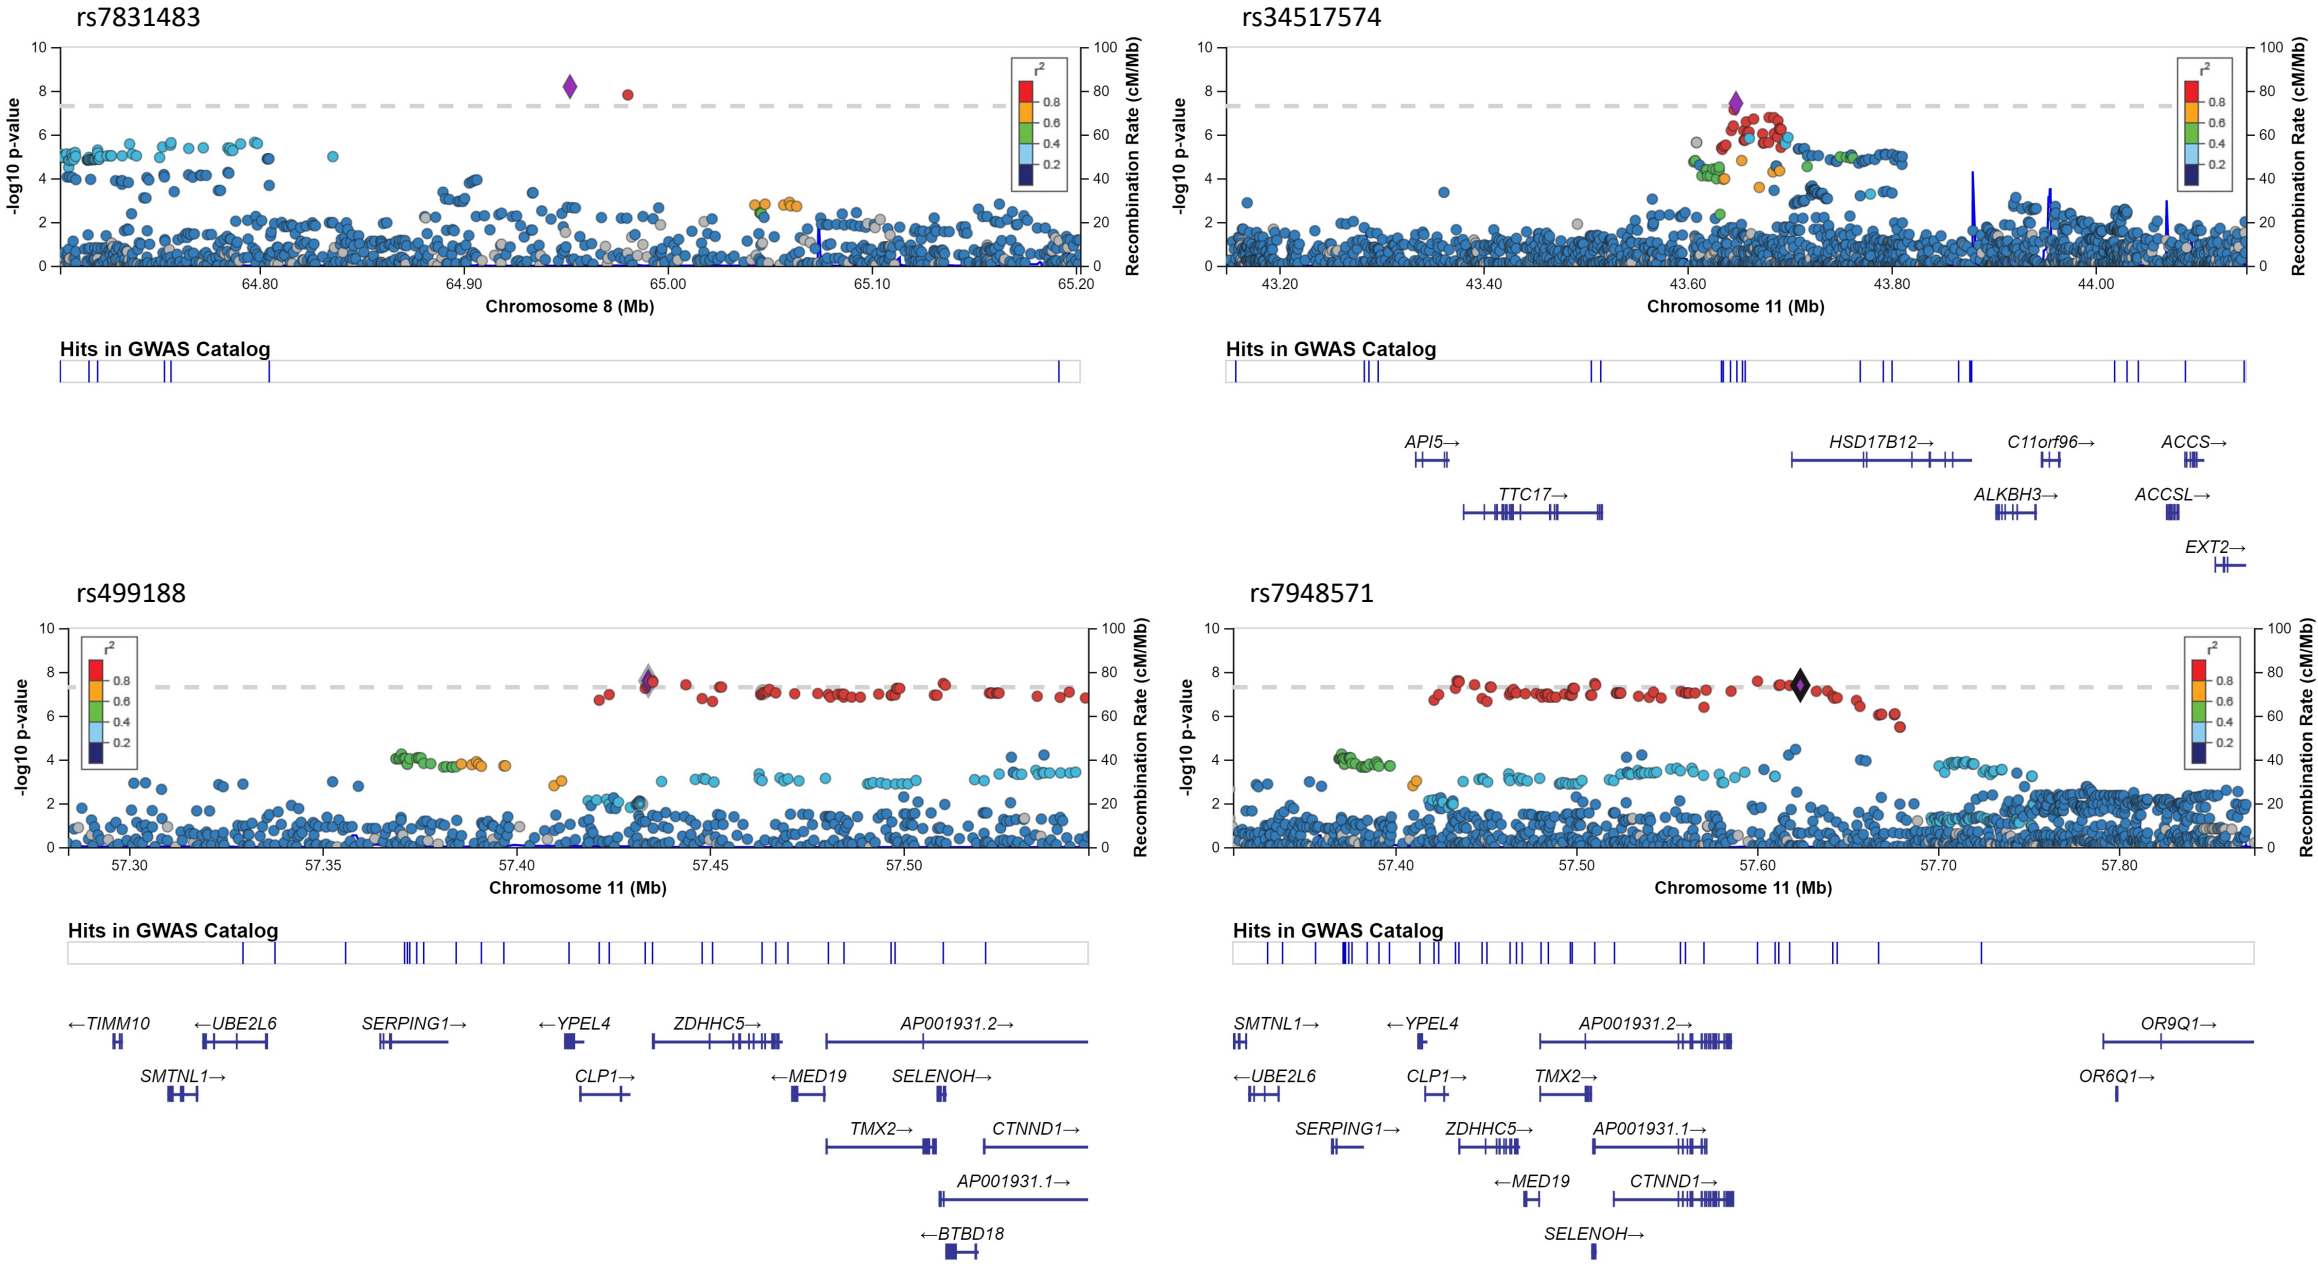

Figure S6: Locus zoom plots for ancestry-specific variants associated with AUD in African Americans

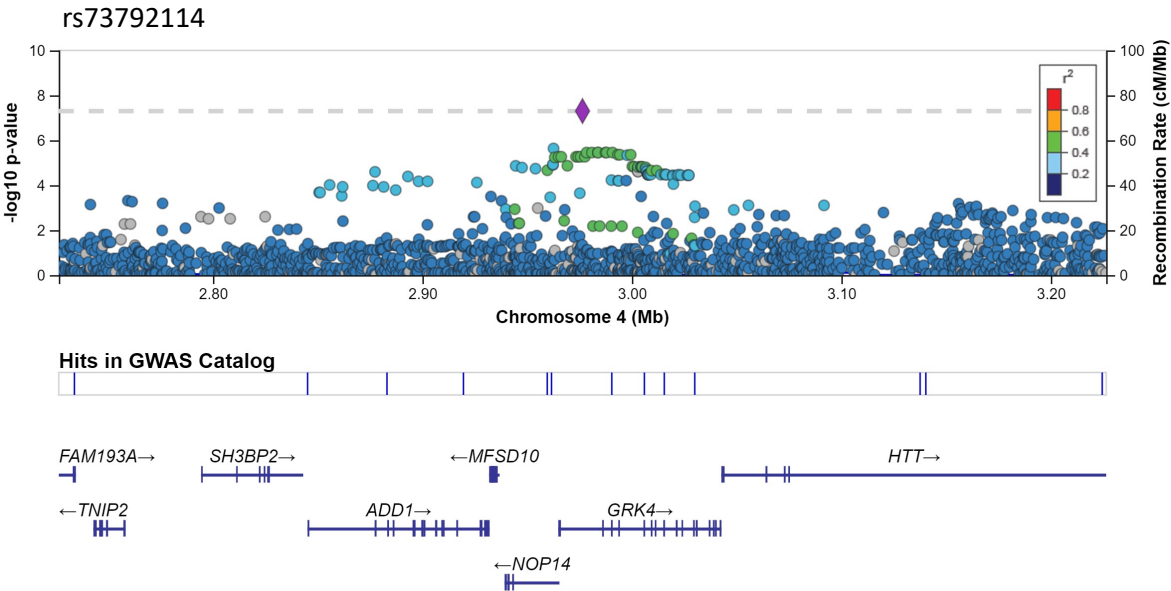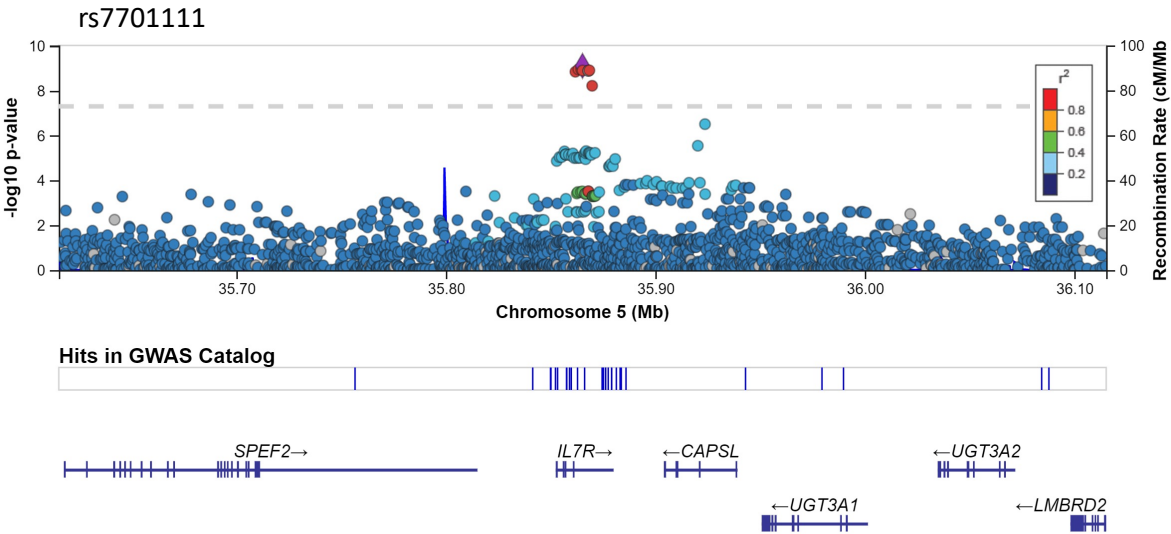

Figure S7: Manhattan plots for AUDIT-C by ancestry

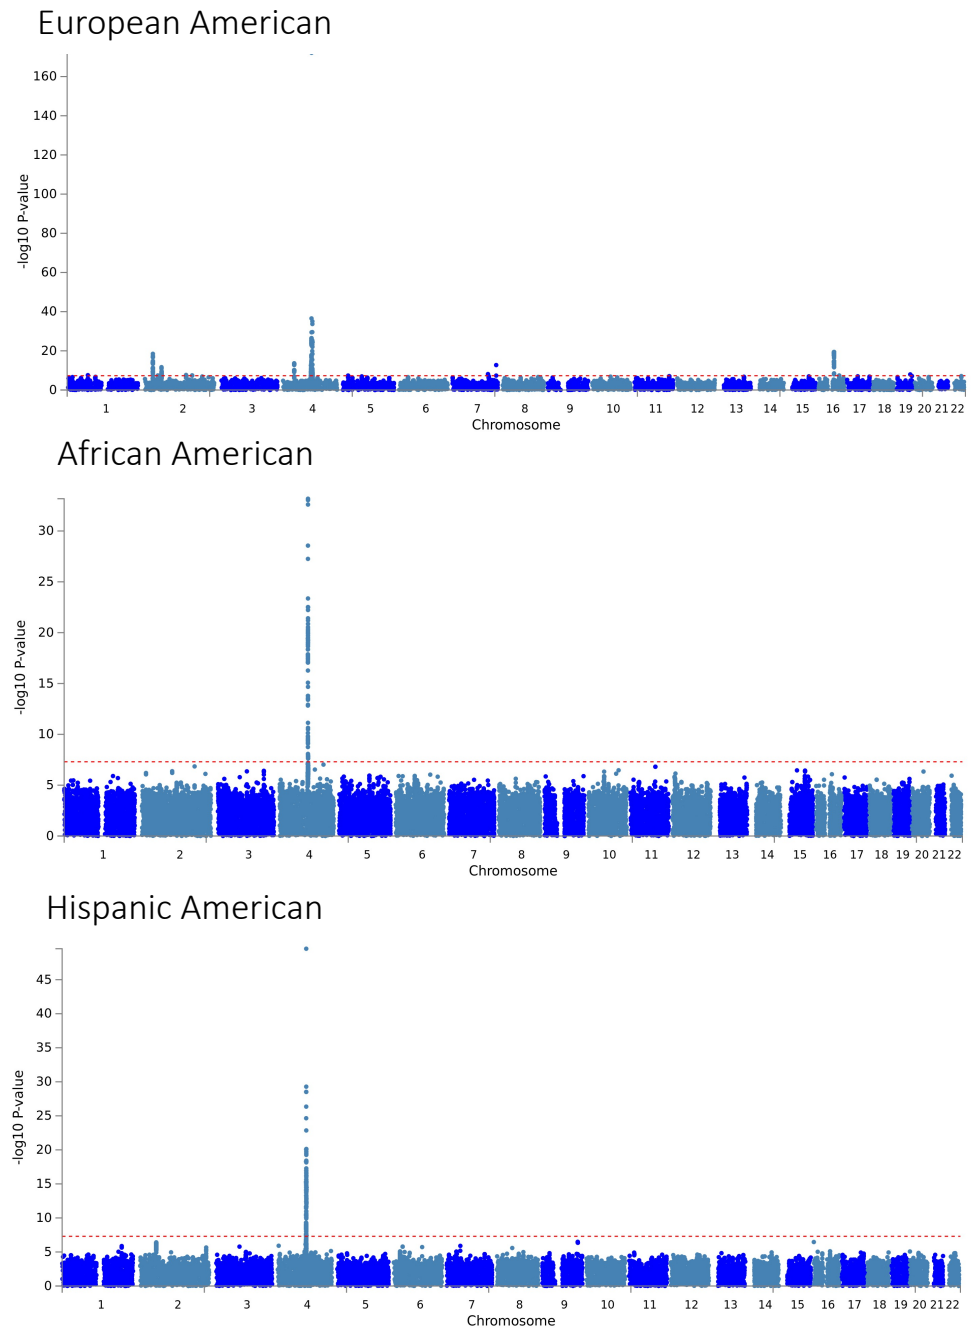

Figure S8: Locus zoom plots for ancestry-specific variants associated with AUDIT-C in European Americans

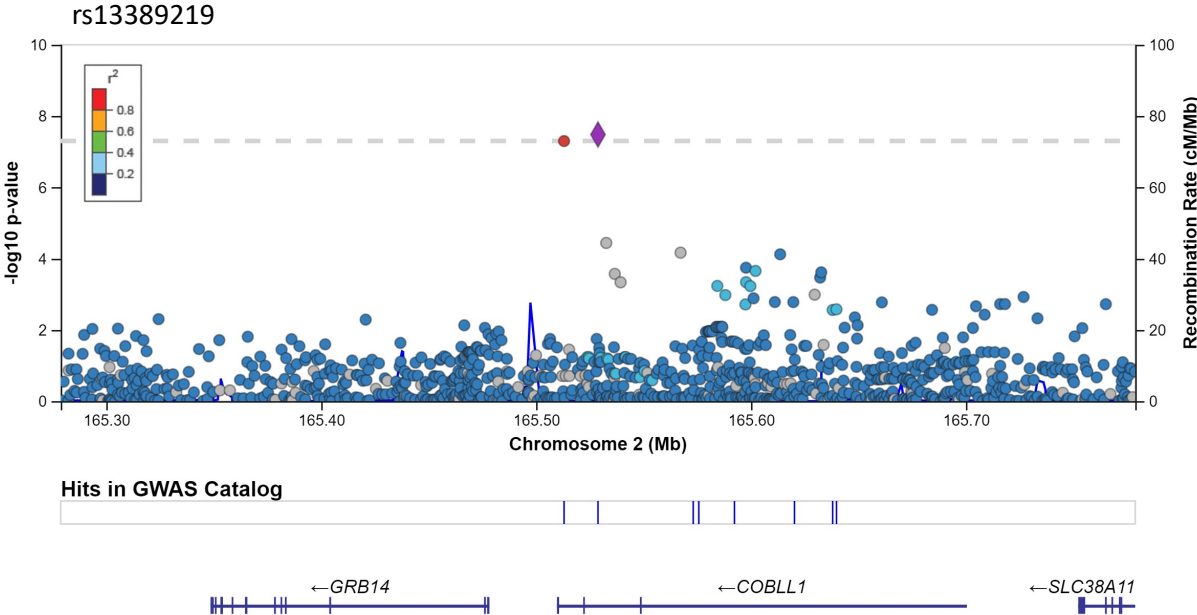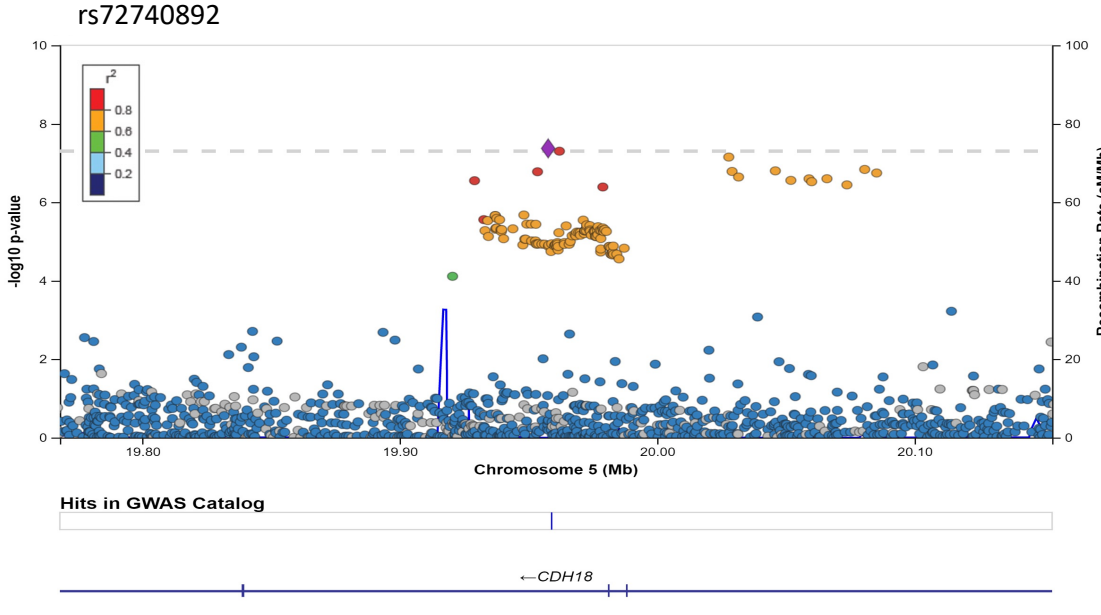



Figure S9: Locus zoom plots for ancestry-specific variants associated with AUDIT-C in African Americans

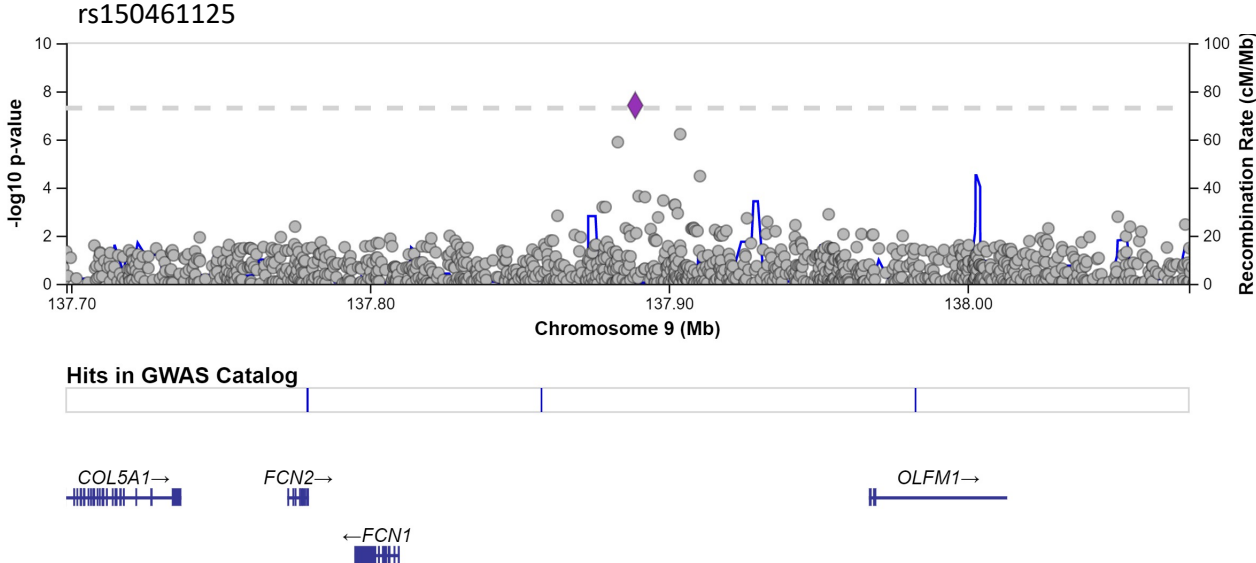

Figure S10: Manhattan plot for AUD (Less Stringent)

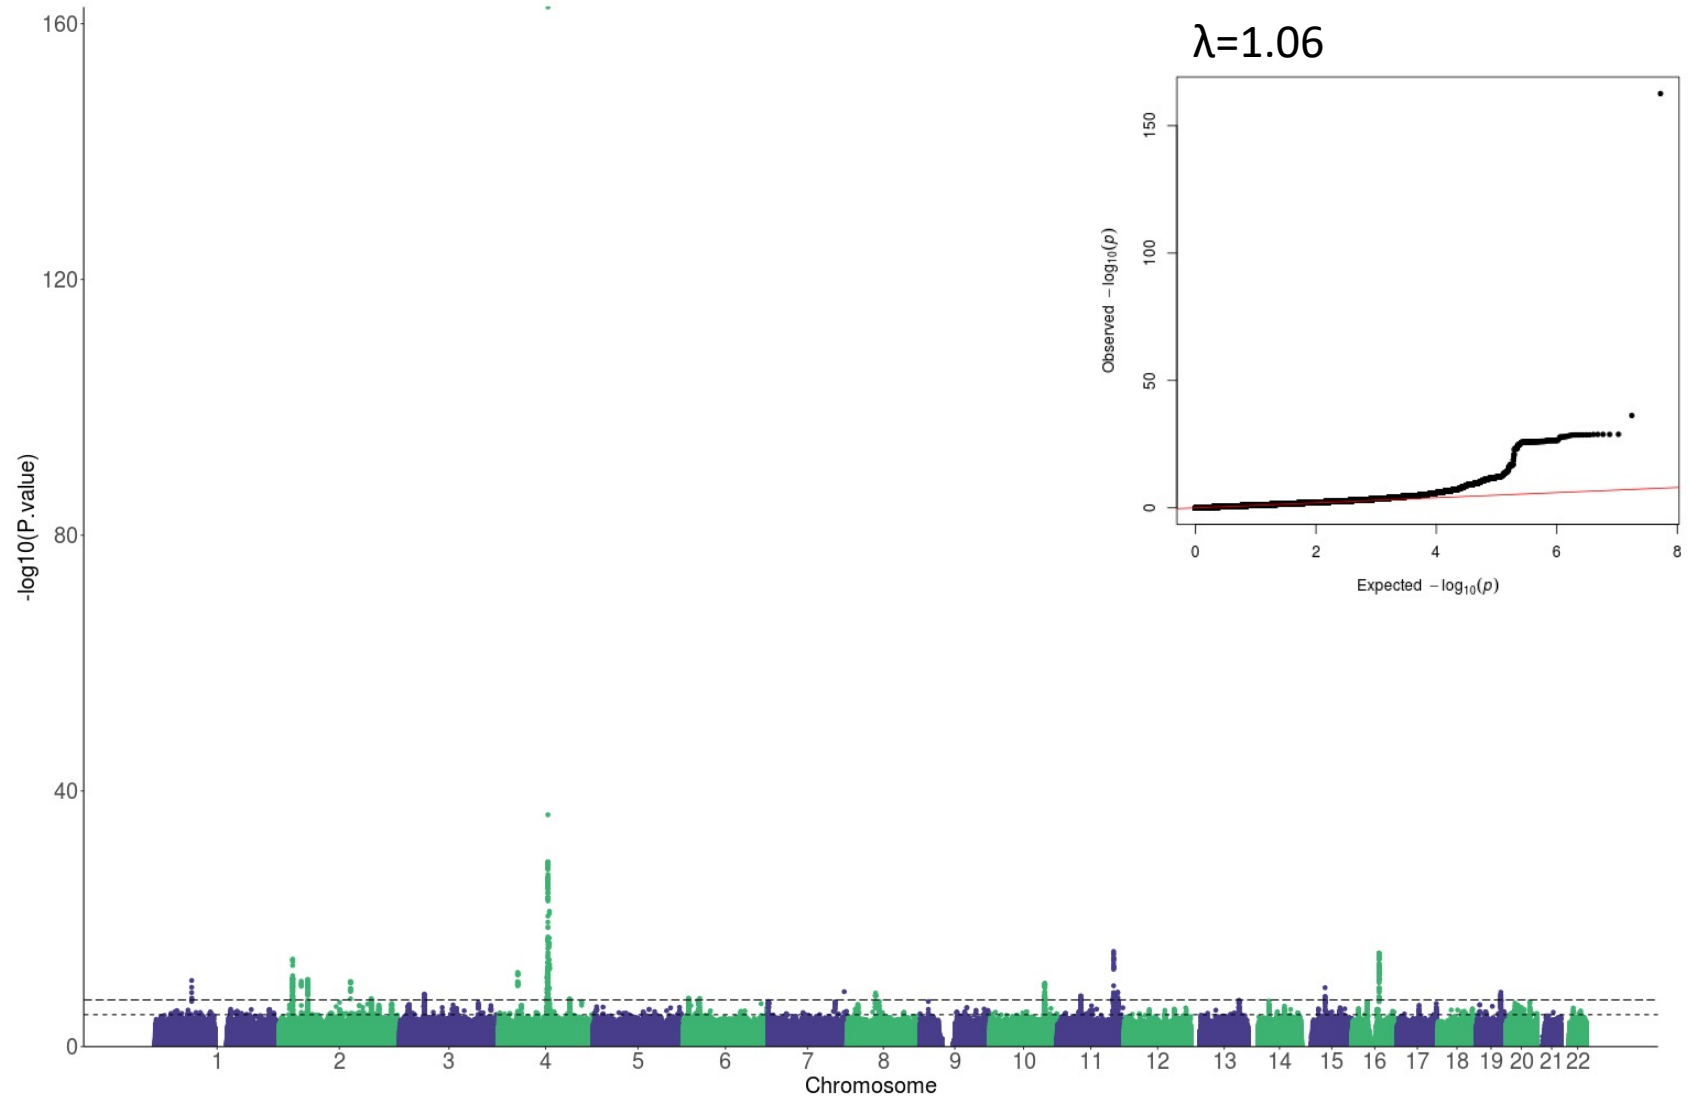

Figure S11: Manhattan plot for AUD (Stringent, AUDIT-C>0)

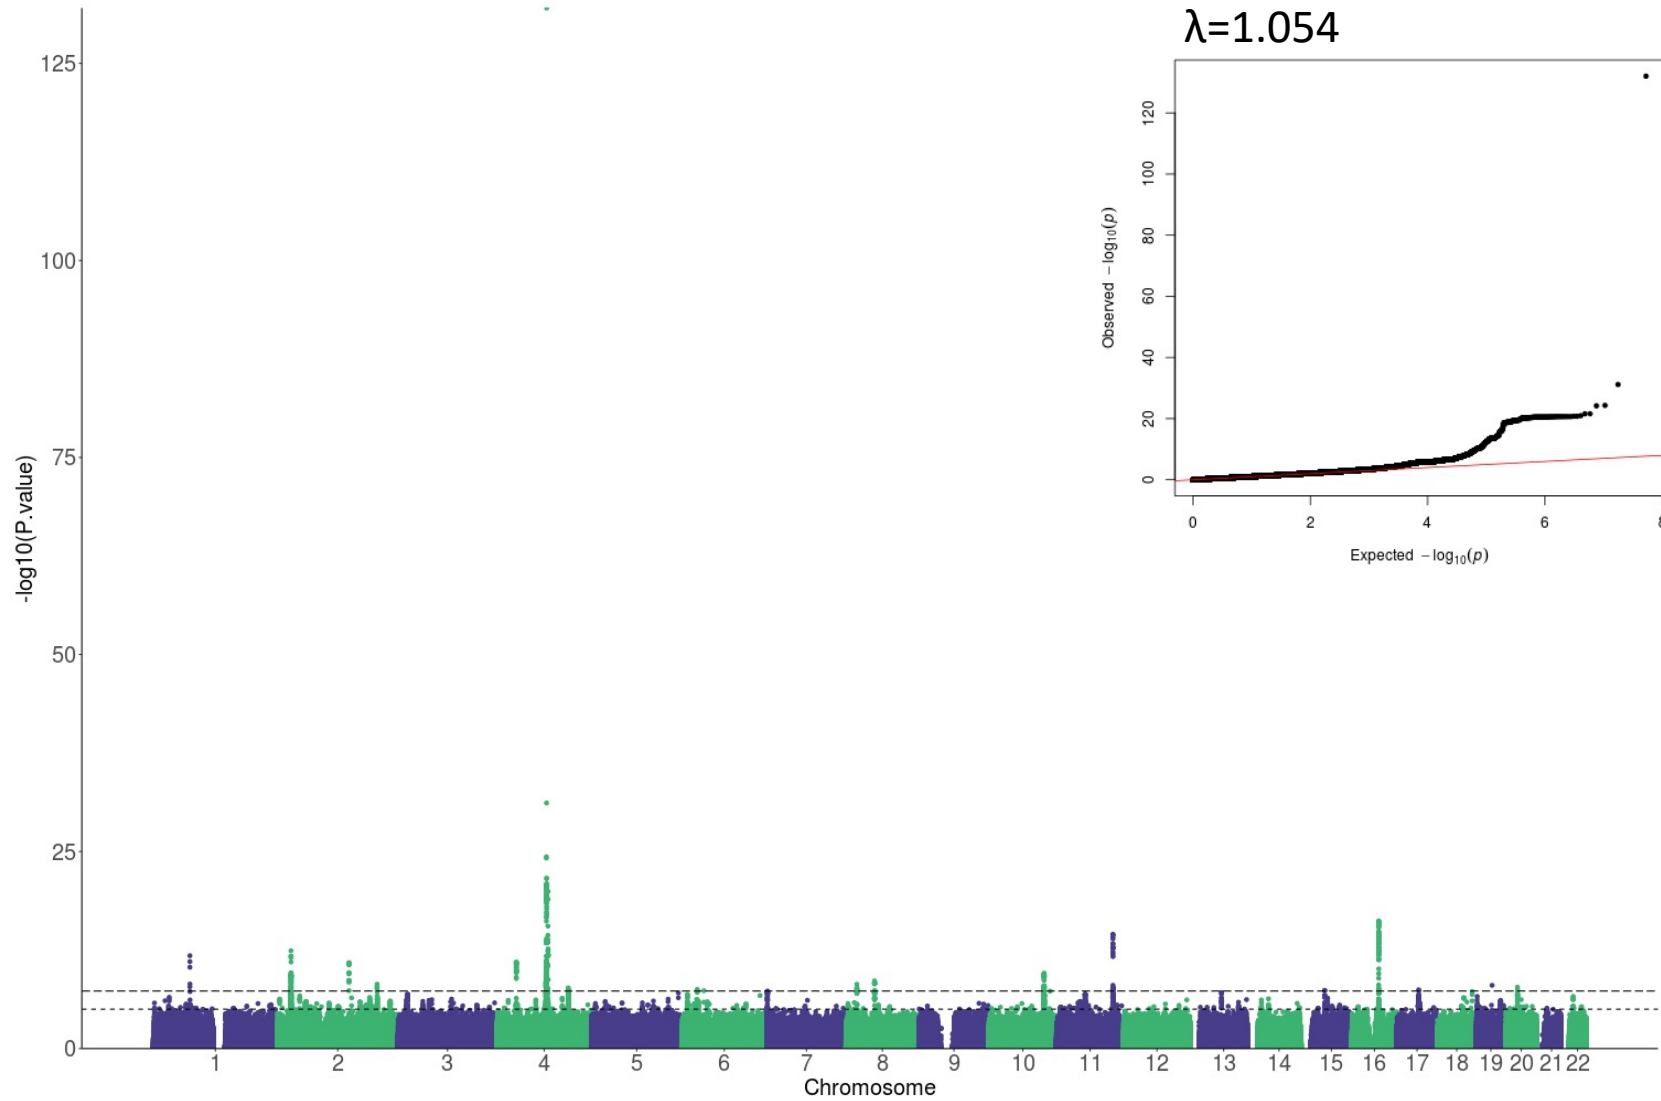

Figure S12: Manhattan plot for AUDIT-C>0

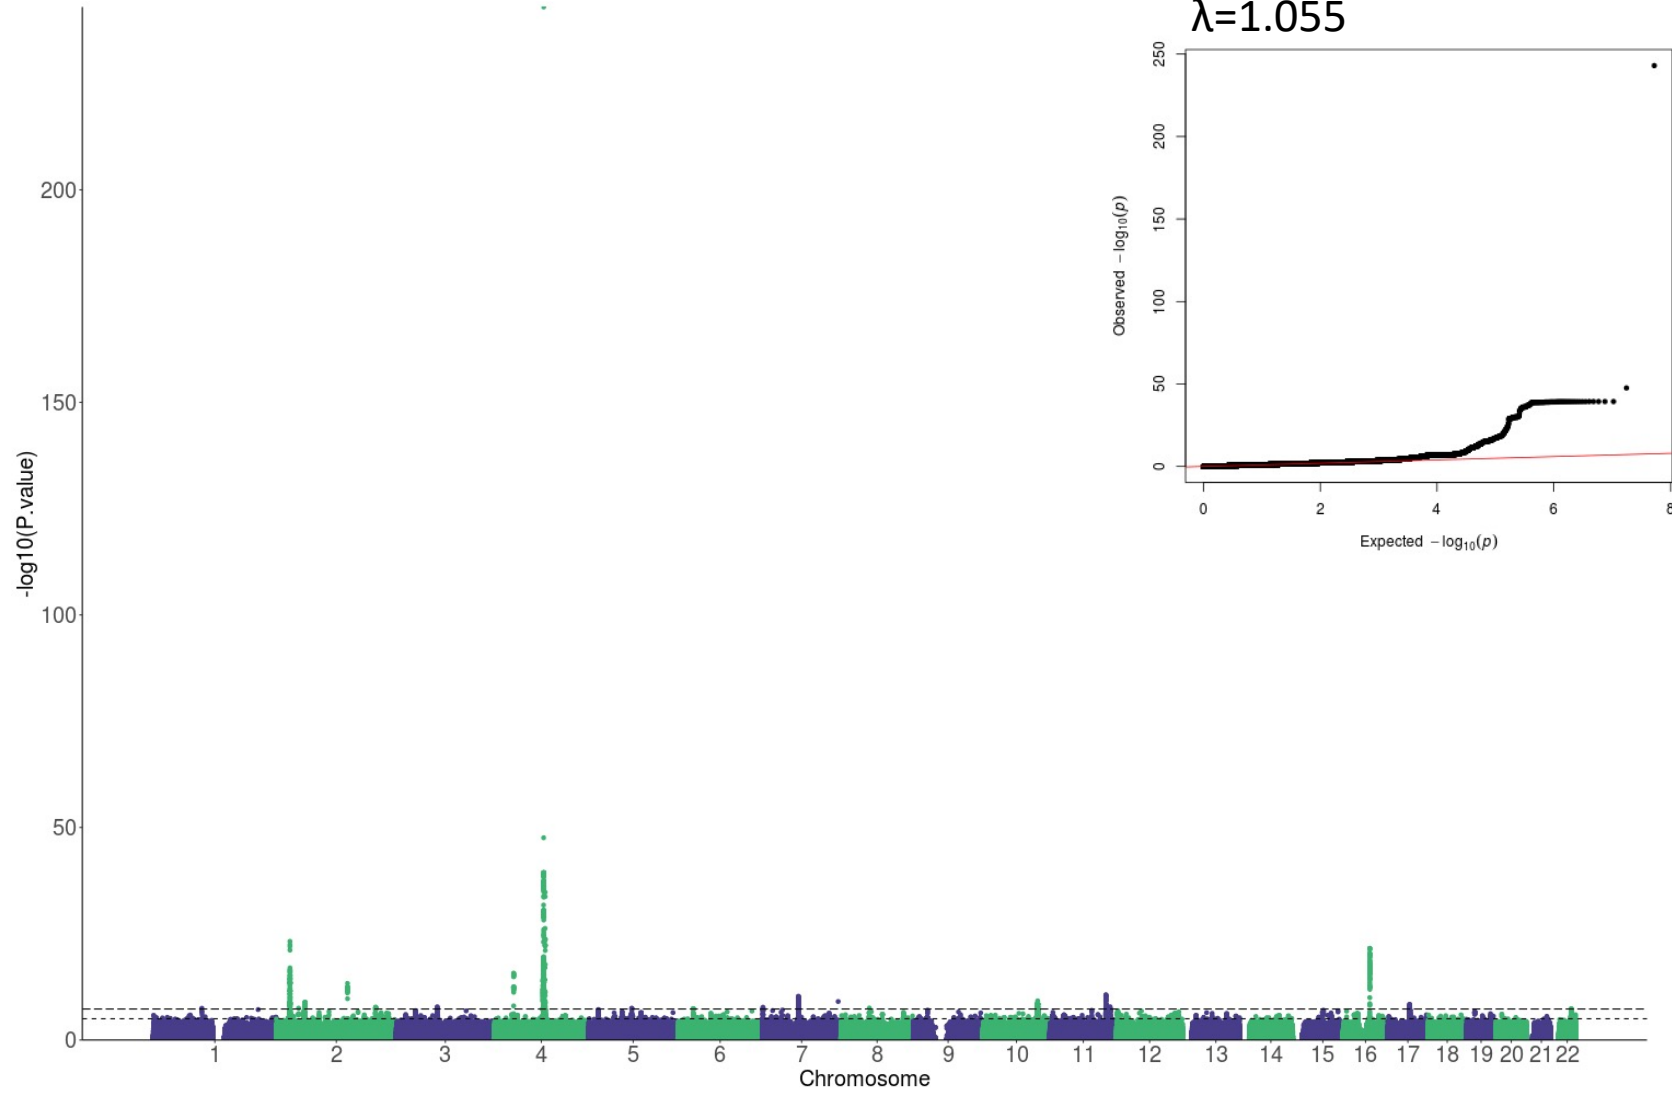

Figure S13: Gene-based association analyses for AUD

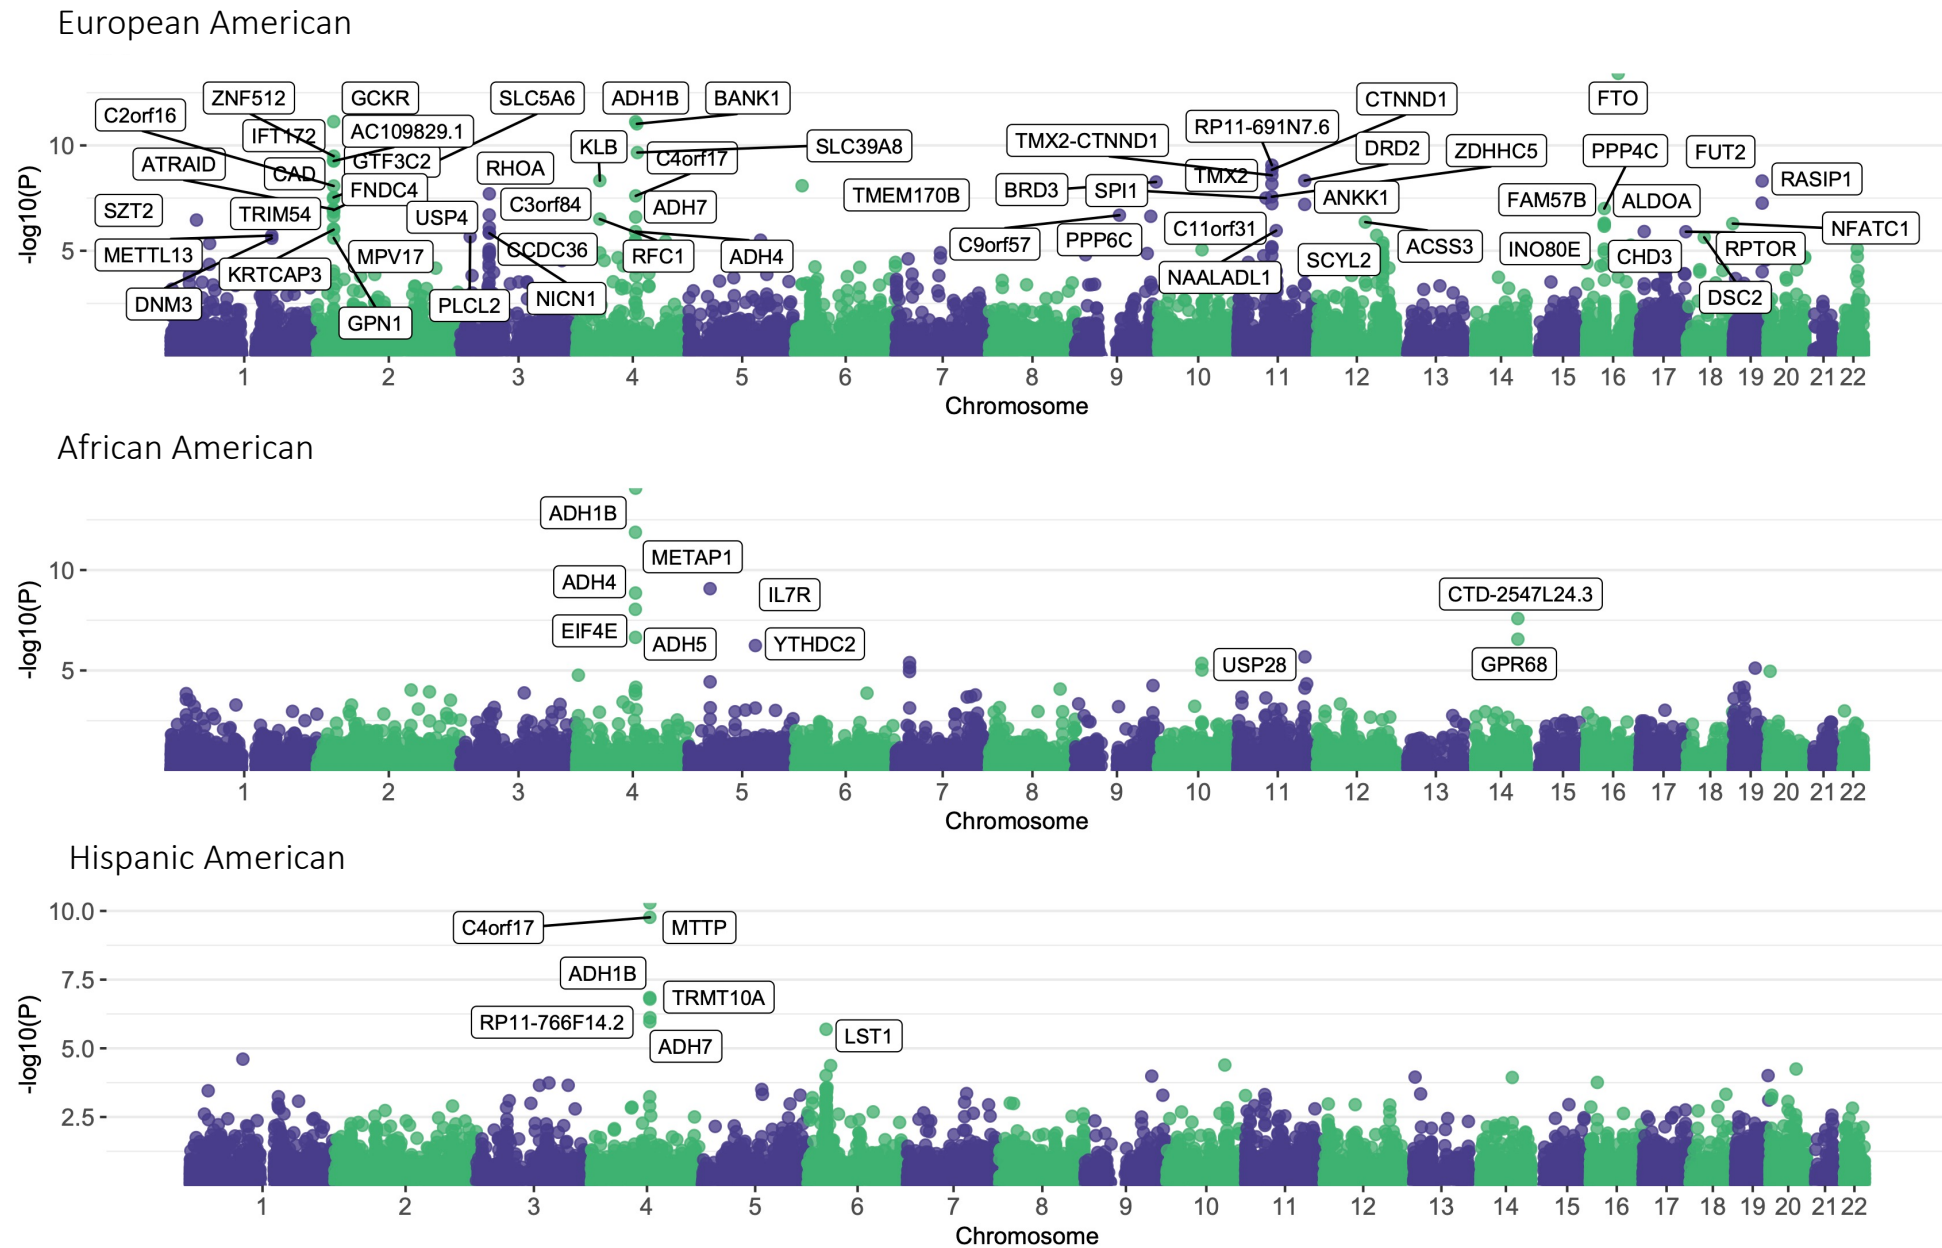

Figure S14: Gene-based association analyses for AUDIT-C

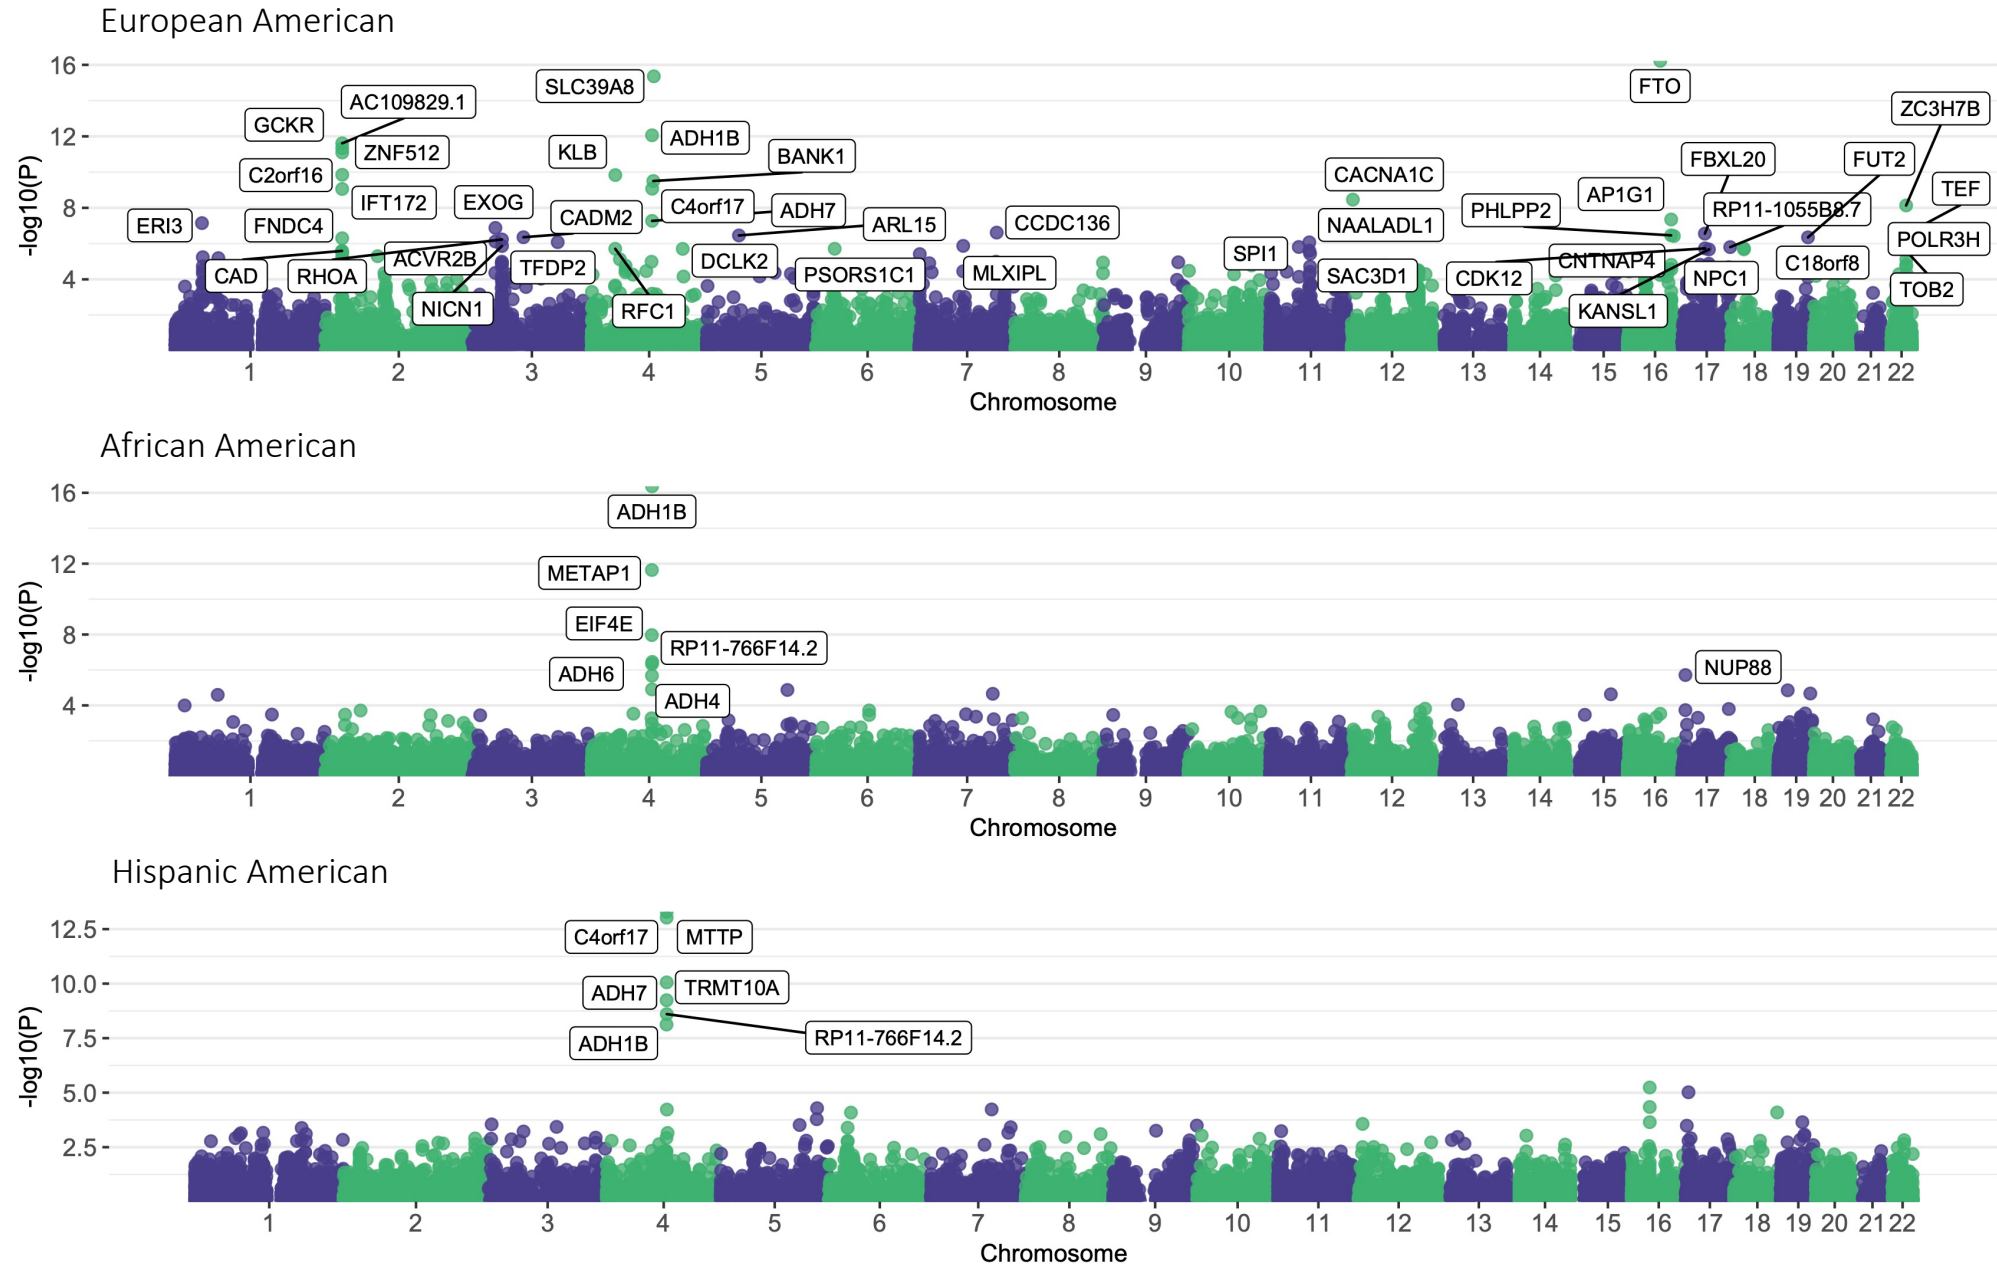

Figure S15: Genetic correlation between phenotypes

European American

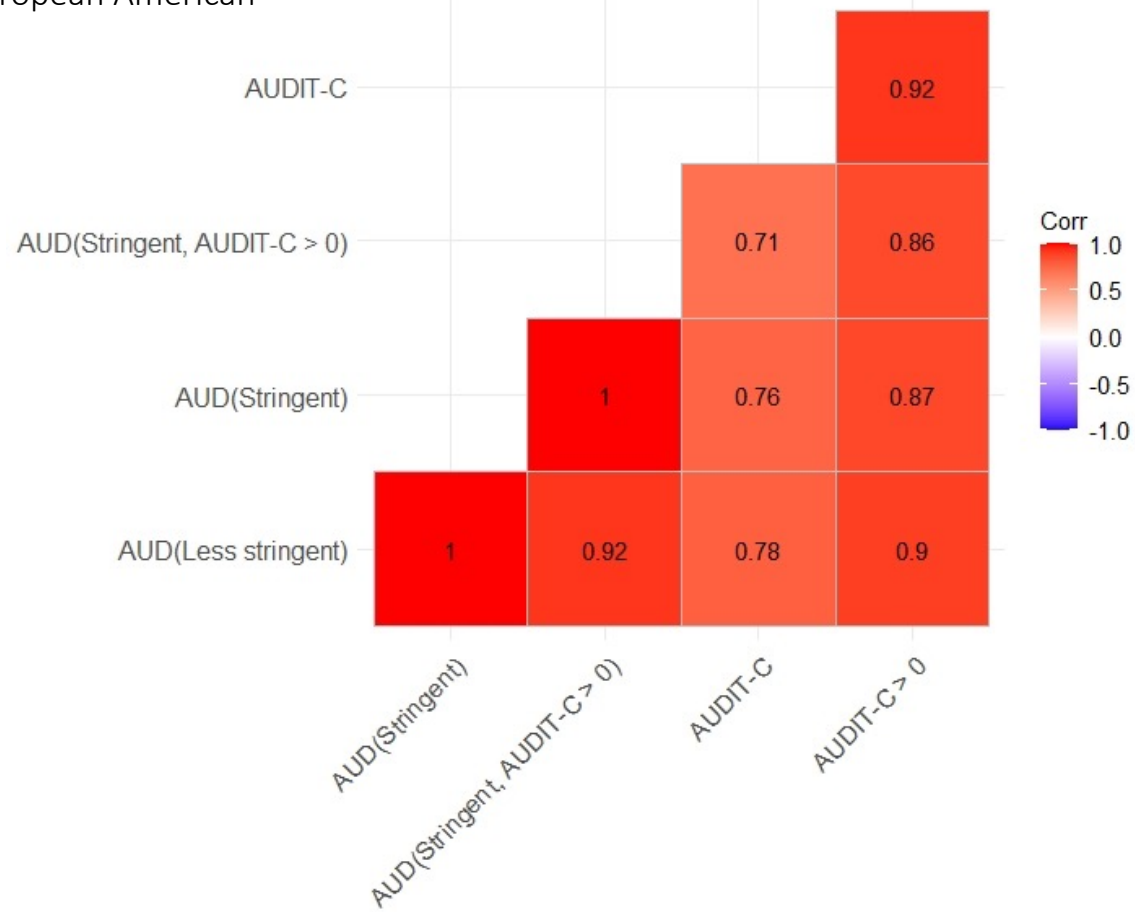

African American

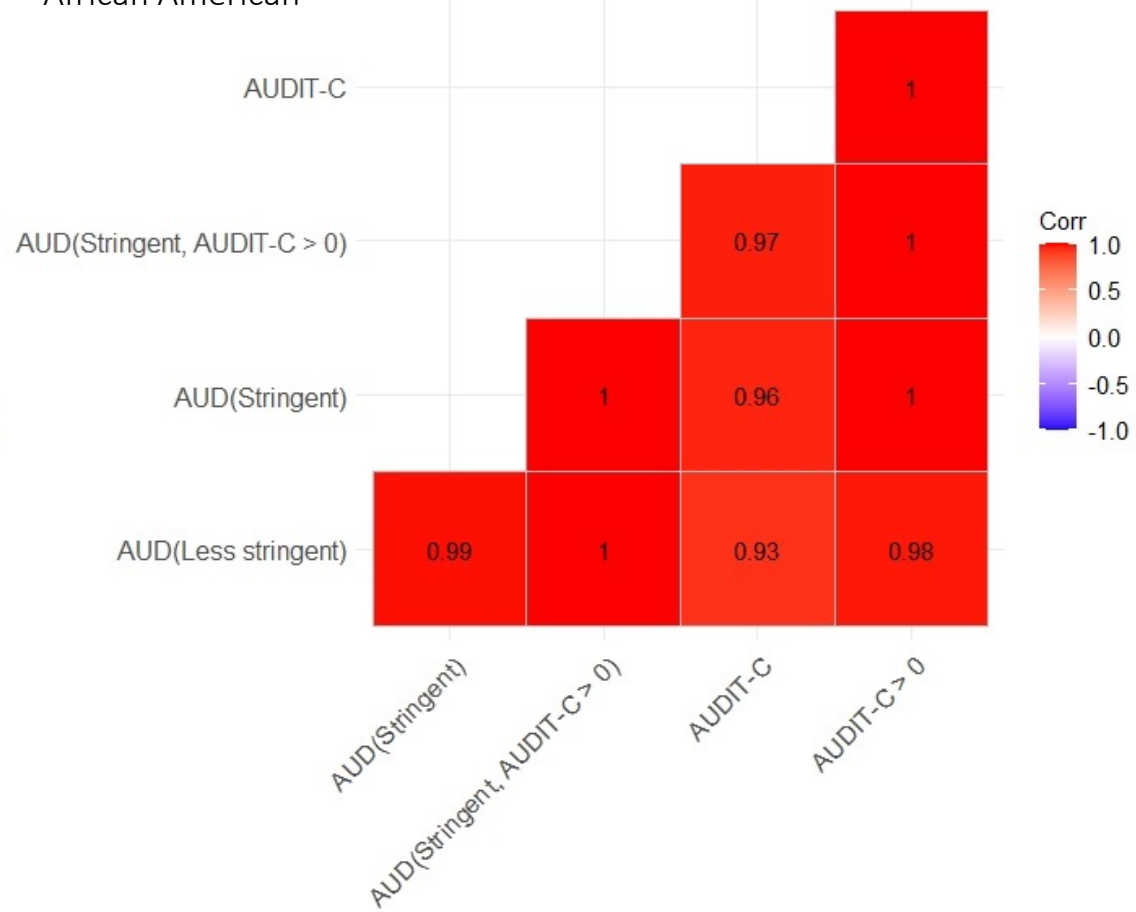

Figure S16: PheWAS in European ancestry individuals in BioVU

### AUD PRS

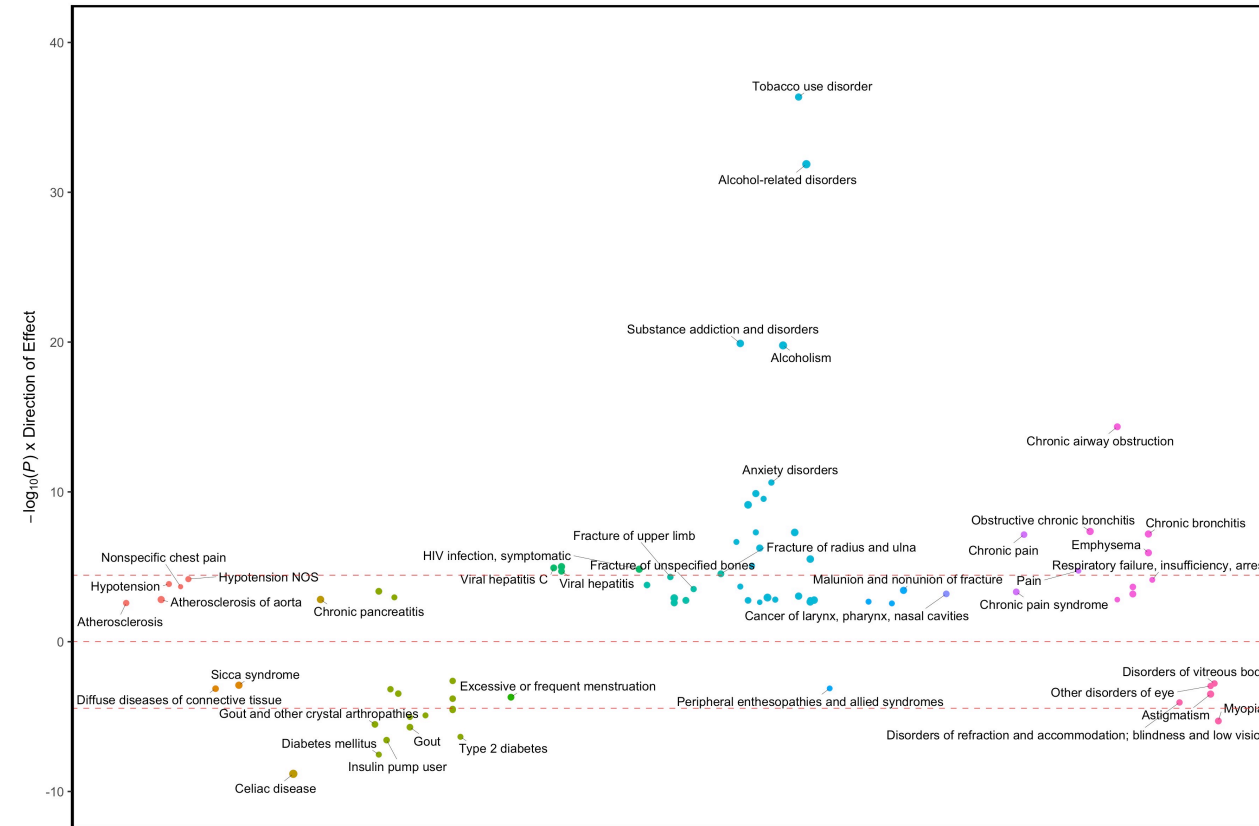

### AUDIT-C PRS

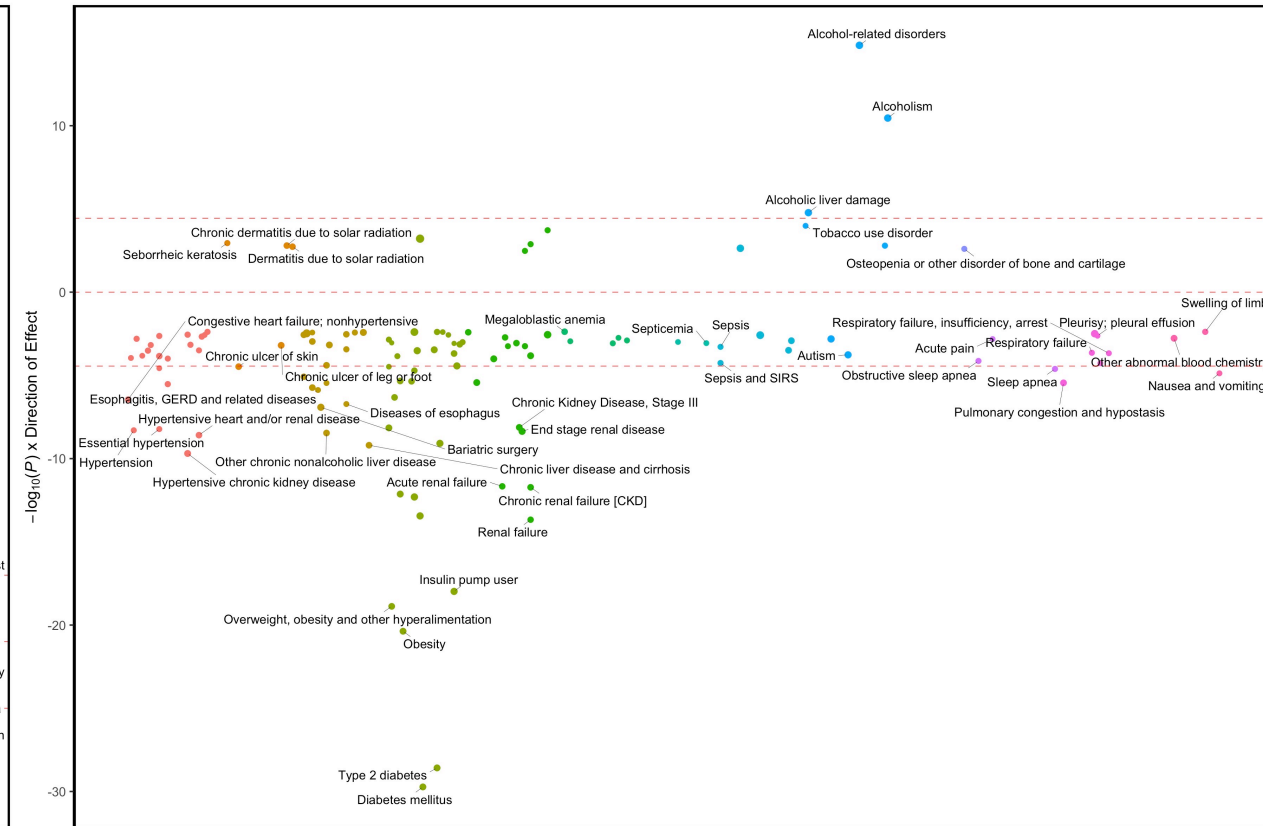

Supplement: appi.ajp.21090892.ds003.pdf [file appi.ajp.21090892.ds003.pdf]
